# Supplementary material
Source: MDPI journal article supplement (https://www.mdpi.com/2073-4395/11/12/2383)
Supplement: s1 [file s1 › agronomy-1441805-supplementary.pdf]

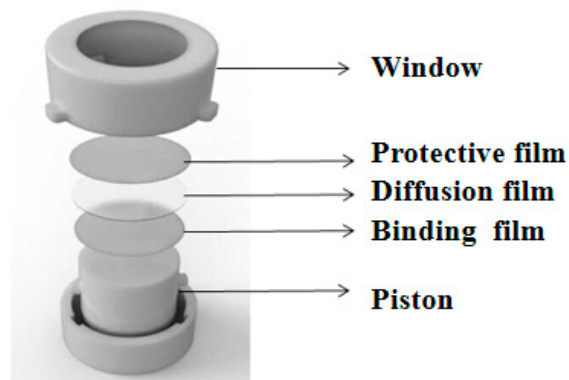

**Figure S1.** LDHs-DGT probe device.

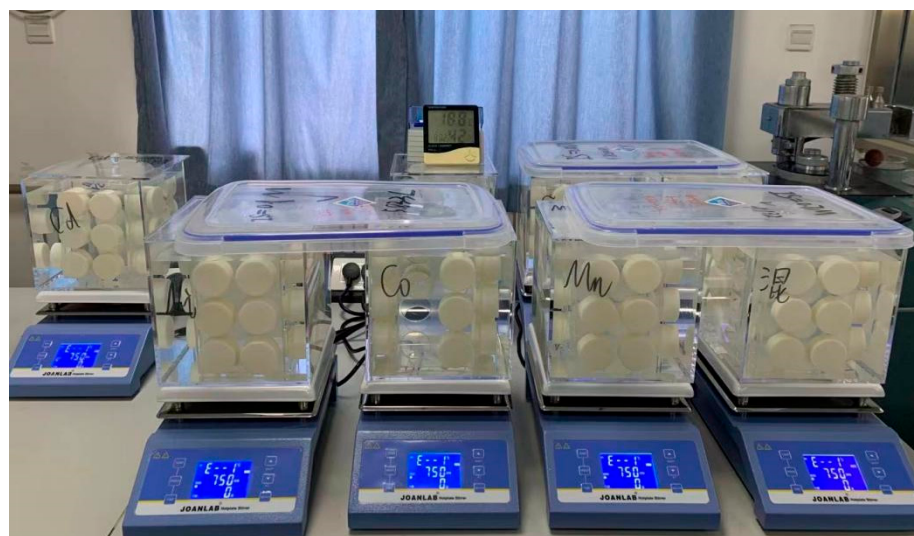

**Figure S2.** LDHs-DGT test stand.

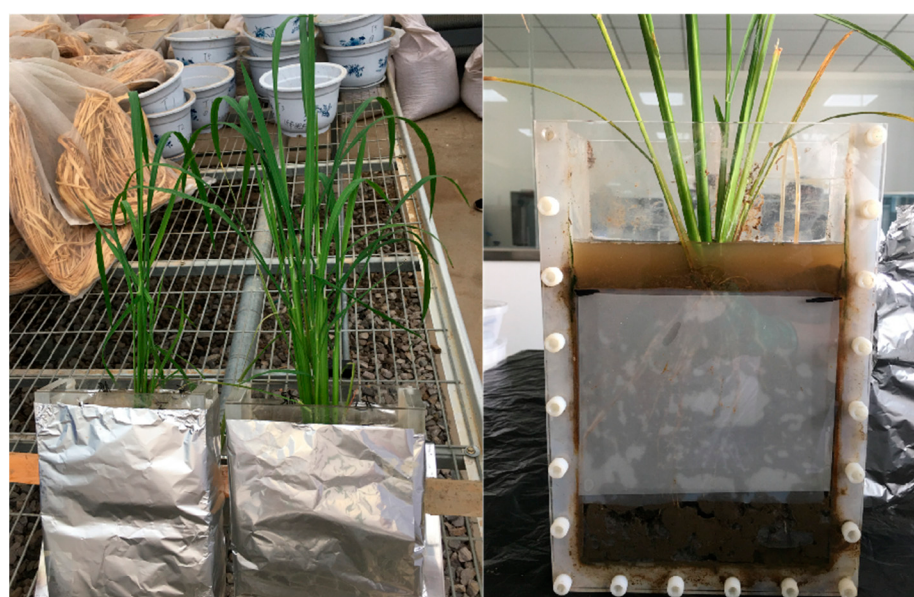

**Figure S3.** Experimental setup for imaging of the dynamic distributions of multi-elements in rice rhizosphere using LDHs-DGT probe.

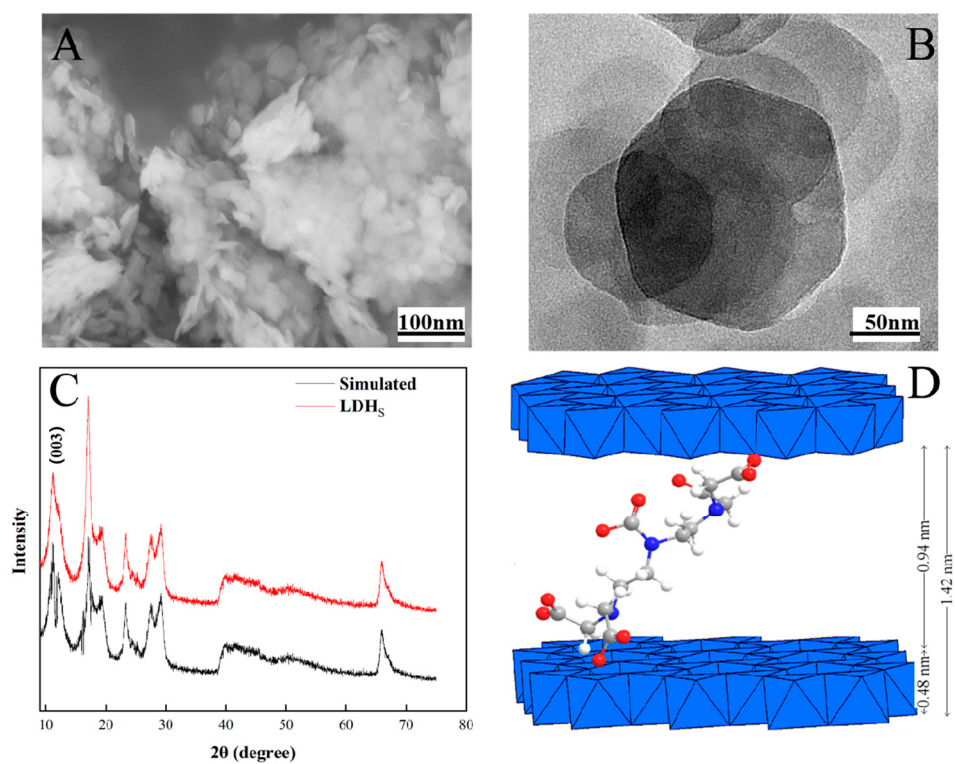

**Figure S4.** SEM (A) and TEM images (B) of LDHs samples; XRD patterns of the standard and as-prepared LDHs (C); Schematic representation of LDHs structure (D).

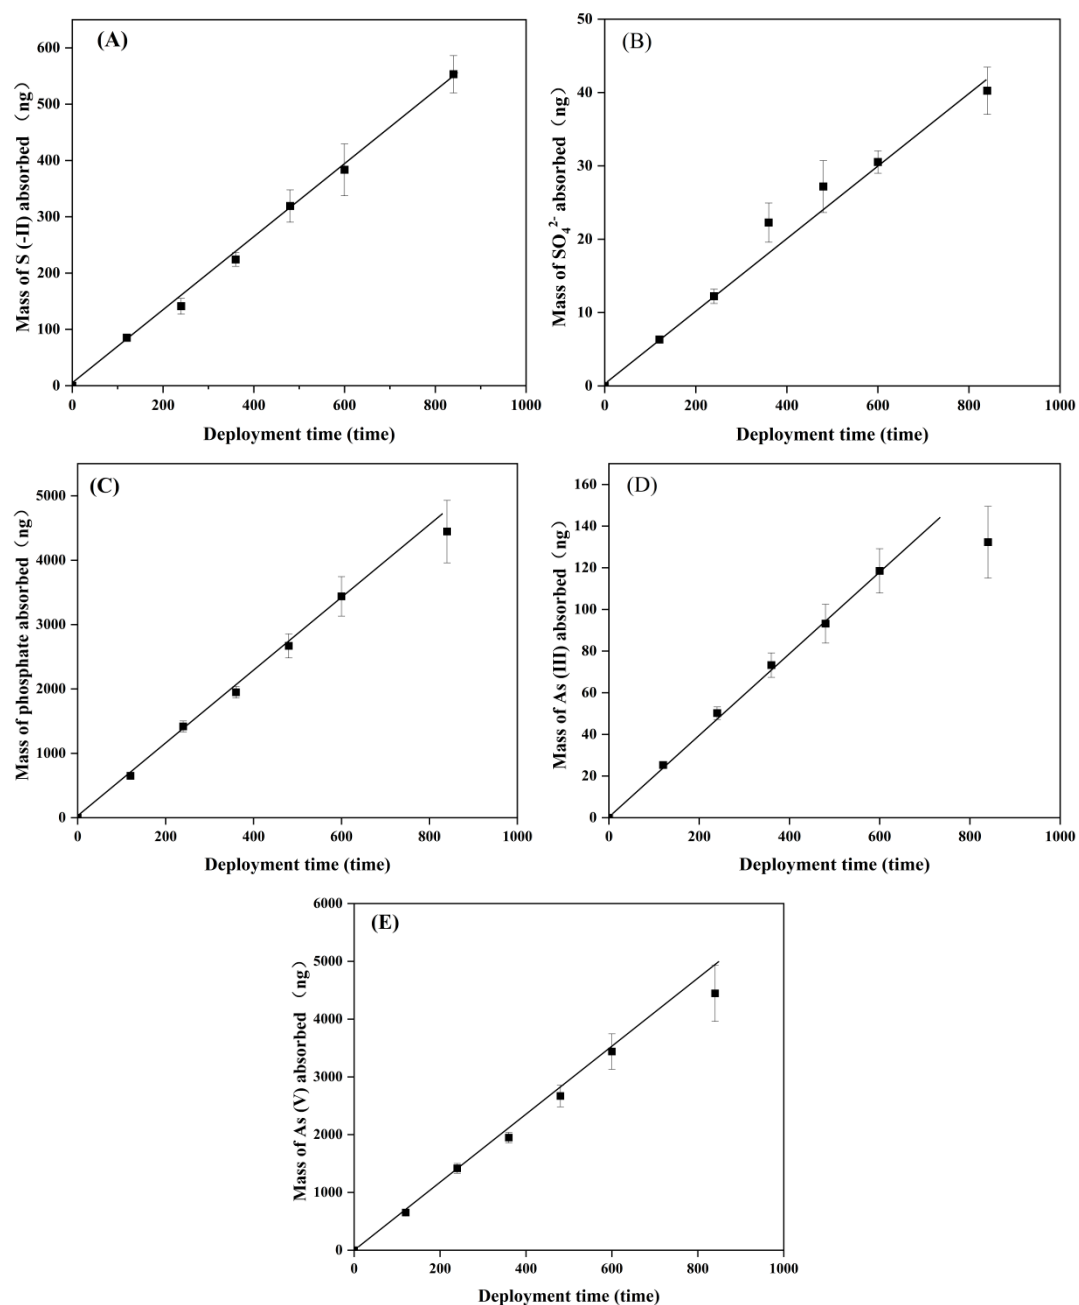

**Figure S5.** The accumulated mass of S(-II) (A),  $\text{SO}_4^{2-}$  (B), phosphate (C), As(III) (D), As(V) (E) in the binding gel with the time of LDHs-DGT deployment. Values are mean  $\pm$  SD (n = 3).

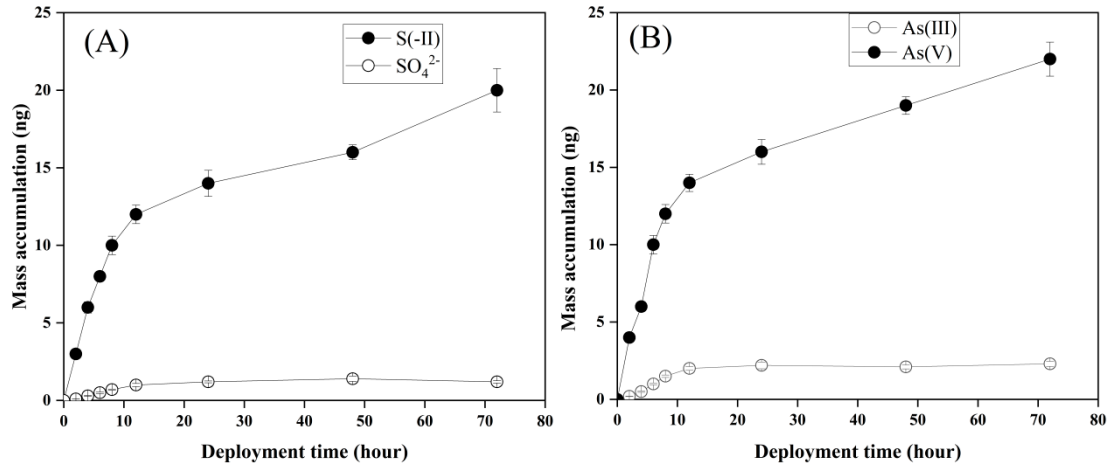

**Figure S6.** LDHs-DGT uptake curve in mixed solution of S(-II) and  $\text{SO}_4^{2-}$  (A), and As(III) and As(V) (B). The value is the average  $\pm$  SD (pH=5.50, n=3).

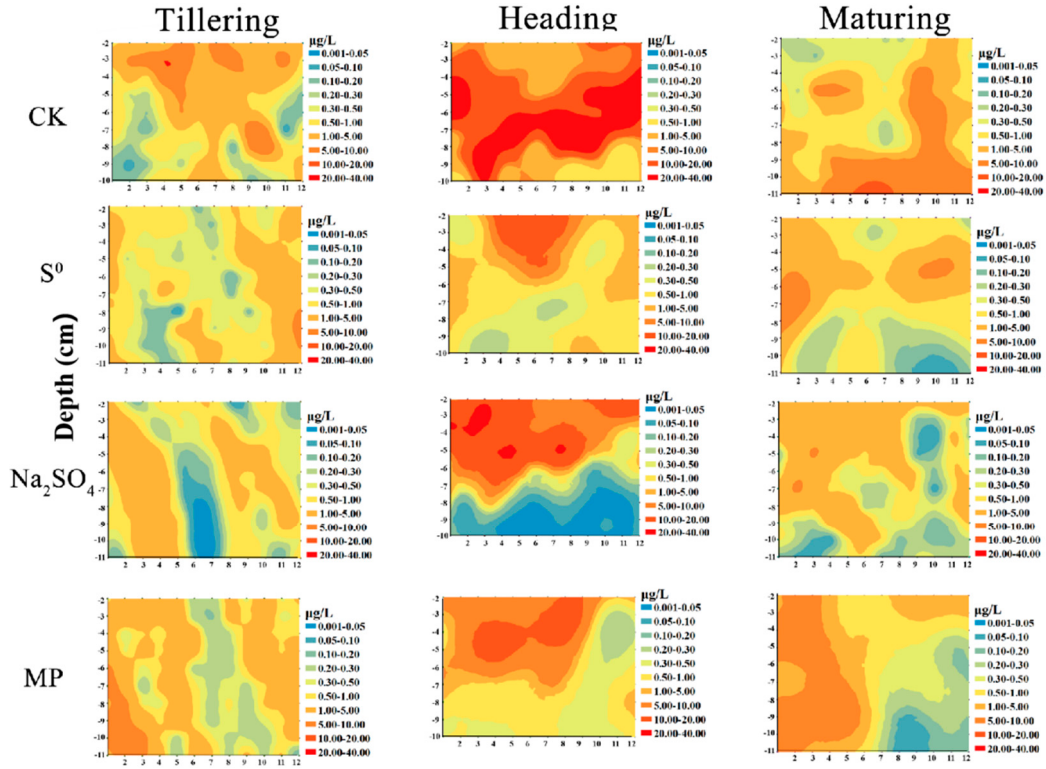

**Figure S7.** Two-dimensional distribution of labile Cd concentrations in rhizosphere at different growth stages of rice. MP refers to mercaptopyrroskite. Arc GIS 10.8 software was used to draw this figure.
